# Supplementary material
Source: PubMed Central journal article supplement (PMC8529947)
Supplement: mmc1.pdf [file mmc1.pdf]

## Appendix

### Section 1. Data selection criteria

Before analysis, we removed data that met one or more of the following criteria:

1. Wrong answers to either of the attention check questions.
2. Contains any of the following types of illogical answers:
  - a. Estimated number of deaths larger than estimated number of infections.
  - b. Estimated death rate in percentage larger than 100.
  - c. Minimum death rate larger than maximum death rate.
3. Duplicated words in the Emotional Recall Task.
4. More than two nonwords in the Emotional Recall Task.
5. Identical answers provided by different participation IDs.

For participants who completed two or more sessions, we removed data from those whose

- reported age in two sessions differed by more than 2 years;
- reported education in two sessions differed by more than one category;
- reported gender in two sessions differed (this criterion may exclude people who changed their gender in 2020. One Chinese participant and one American participant switched reported gender during the four waves. A few participants answered “decline to tell” in one session and a specific gender in the other. In these cases, we took the specific gender as the response);
- and responses had missing data for the variables we included in the analysis (3 Chinese participants and 4 American participants).

## Section 2: Frequency Table of Emotion Words Produced in the Emotional Recall Task

**Table S1**

*Frequency Table of Top 20 Emotion Words Produced Across the Four Waves of Data Collection*

| The United States |           |           | China      |                     |           |
|-------------------|-----------|-----------|------------|---------------------|-----------|
| Emotions          | Frequency | In PANAS? | Emotions   | Frequency           | In PANAS? |
|                   |           |           | In Chinese | English Translation |           |
| tired             | 29%       |           | 开心         | happy               | 30%       |
| happy             | 25%       |           | 平静         | calm                | 23%       |
| worried           | 20%       |           | 焦虑         | anxious             | 22%       |
| anxious           | 19%       |           | 无聊         | bored               | 20%       |
| sad               | 16%       |           | 期待         | hopeful             | 17%       |
| calm              | 14%       |           | 担心         | worried             | 16%       |
| bored             | 13%       |           | 累          | tired               | 15%       |
| content           | 12%       |           | 紧张         | nervous             | 14% Yes   |
| stressed          | 12%       |           | 烦躁         | irritated           | 11%       |
| hopeful           | 12%       |           | 难过         | sad                 | 10%       |
| frustrated        | 11%       |           | 兴奋         | excited             | 9% Yes    |
| busy              | 10%       |           | 郁闷         | depressed           | 9%        |
| nervous           | 9%        | Yes       | 忙碌         | busy                | 9%        |
| angry             | 8%        |           | 愤怒         | angry               | 8%        |
| relaxed           | 8%        |           | 迷茫         | confused            | 8%        |
| concerned         | 8%        |           | 无奈         | resigned            | 6%        |
| annoyed           | 7%        |           | 轻松         | relaxed             | 6%        |
| interested        | 7%        | Yes       | 压力         | stressed            | 6%        |
| scared            | 7%        | Yes       | 充实         | fulfilled           | 5%        |
| excited           | 6%        | Yes       | 受打击        | battered            | 4%        |
| depressed         | 6%        |           | 沮丧         | frustrated          | 4%        |

*Note:* Frequency refers to the averaged proportion of participants reporting that word in one wave. Positive words in PANAS were colored in blue and negative words in PANAS were colored in red.

### **Section 3: Analyses of Entire Valid Samples**

We present analyses on the overlap samples in the main text. Here, we present the analyses on the entire valid samples. The results are largely consistent between the two. Note that we did not administer the behavioral questions in the first wave. Rather, in the second wave we asked participants to recall their behaviors in mid-February (time of Wave 1). Therefore, analysis that involves preventive behavior can only be conducted on the overlap samples.

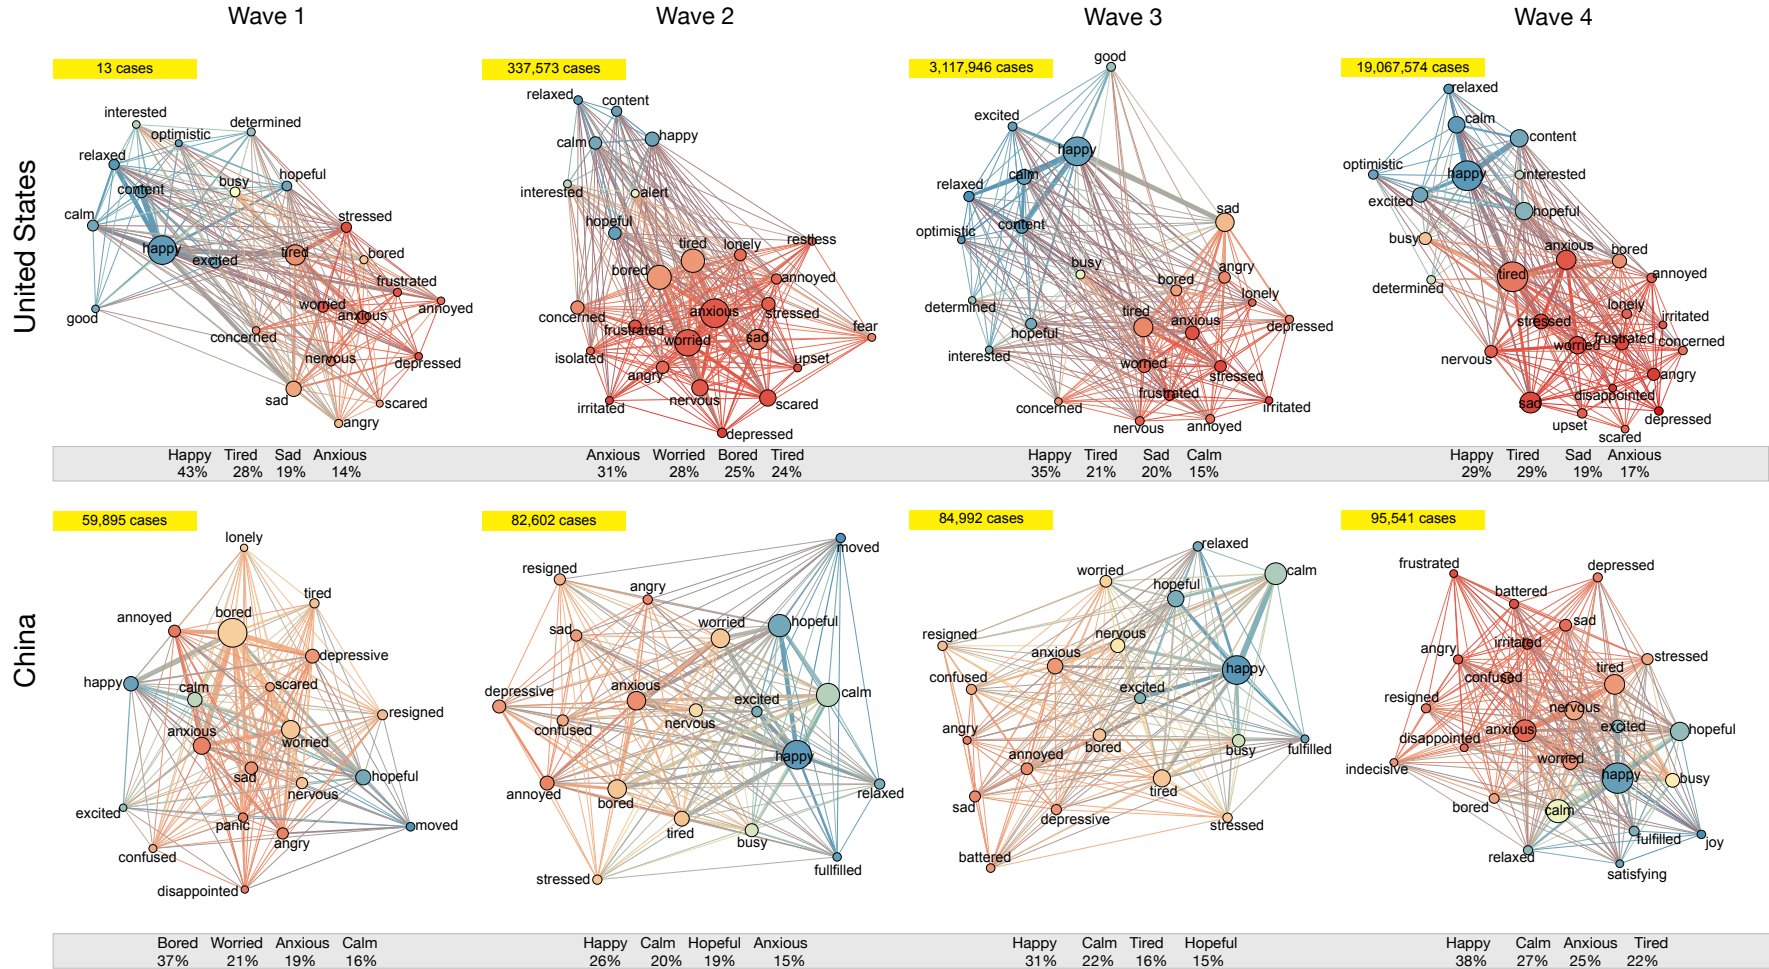

**Figure S1.** Emotional Recall Task (ERT) responses visualized as an experiential co-occurrence network. Corresponds to Figure 2 in the main text.

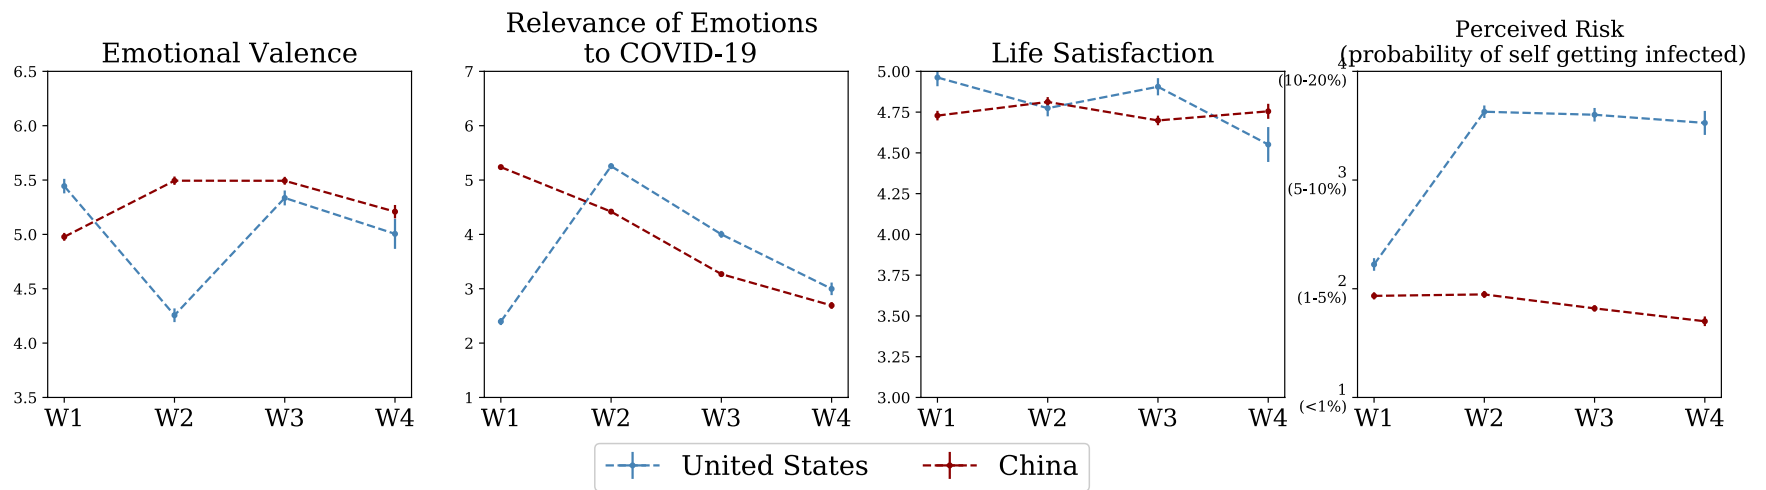

**Figure S2.** Changes in emotional valence, relevance of reported emotions to the COVID-19 pandemic, life satisfaction, and perceived risk across the four waves of data collection. Corresponds to Figure 3 in the main text.

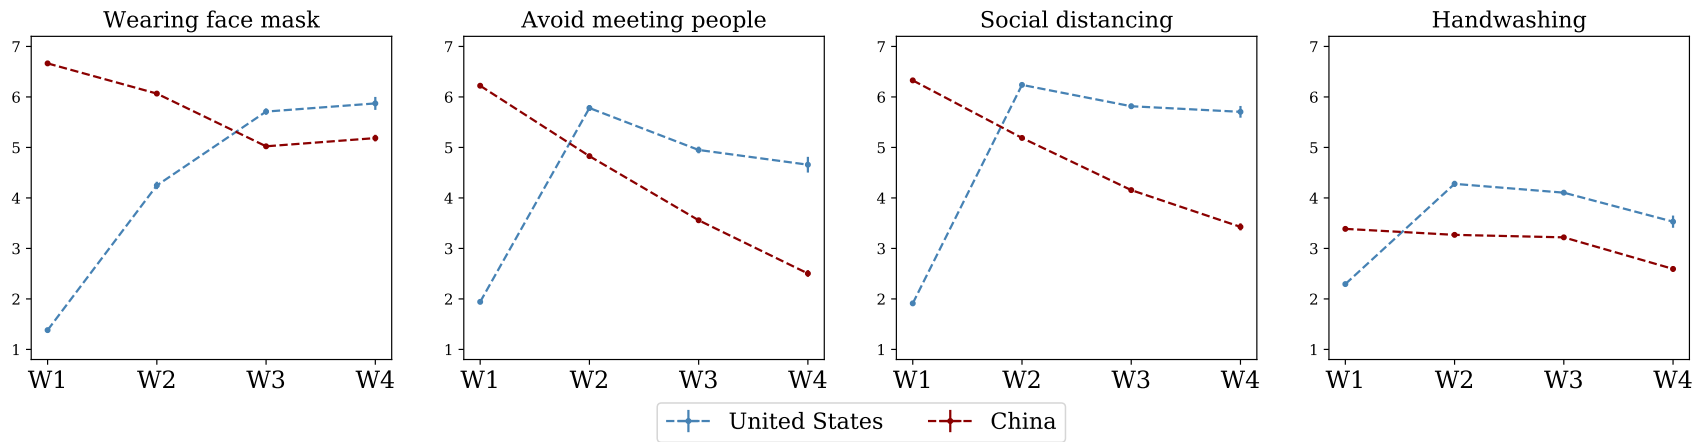

**Figure S3.** Mean reported engagement in four preventive behaviors. Corresponds to Figure 5 in the main text.

Table S2

Summary of Regression Models Predicting Preventive Behaviors. Corresponds to Table 2 in the main text

| <i>Predictors</i>                        | United States    |                  |                  |                  |                  |                  |                  |                  | China            |                  |                  |                  |                  |                  |                  |                  |
|------------------------------------------|------------------|------------------|------------------|------------------|------------------|------------------|------------------|------------------|------------------|------------------|------------------|------------------|------------------|------------------|------------------|------------------|
|                                          | Wave 1           |                  | Wave 2           |                  | Wave 3           |                  | Wave 4           |                  | Wave 1           |                  | Wave 2           |                  | Wave 3           |                  | Wave 4           |                  |
|                                          | <i>Estimates</i> | <i>p</i>         |
| (Intercept)                              | 0.45             | <b>0.002</b>     | -0.27            | <b>0.007</b>     | -0.14            | 0.252            | -0.05            | 0.835            | -0.09            | 0.449            | -0.10            | 0.182            | -0.03            | 0.603            | 0.01             | 0.937            |
| Fear & anxiety                           | -0.04            | 0.403            | 0.11             | <b>0.001</b>     | 0.06             | 0.072            | 0.03             | 0.653            | 0.06             | <b>0.048</b>     | 0.02             | 0.305            | -0.01            | 0.585            | -0.05            | 0.194            |
| Worry                                    | 0.00             | 0.918            | 0.13             | <b>&lt;0.001</b> | 0.11             | <b>0.001</b>     | 0.10             | 0.100            | 0.08             | <b>0.011</b>     | -0.01            | 0.726            | 0.03             | 0.090            | 0.02             | 0.666            |
| Boredom                                  | -0.01            | 0.864            | 0.01             | 0.808            | -0.01            | 0.813            | 0.04             | 0.542            | 0.04             | 0.194            | -0.02            | 0.419            | -0.02            | 0.257            | -0.08            | <b>0.031</b>     |
| Information acquisition                  | 0.27             | <b>&lt;0.001</b> | 0.15             | <b>&lt;0.001</b> | 0.22             | <b>&lt;0.001</b> | 0.24             | <b>&lt;0.001</b> | 0.10             | <b>0.002</b>     | 0.19             | <b>&lt;0.001</b> | 0.23             | <b>&lt;0.001</b> | 0.22             | <b>&lt;0.001</b> |
| Knowledge about COVID-19                 | 0.07             | 0.198            | 0.12             | <b>&lt;0.001</b> | 0.14             | <b>&lt;0.001</b> | 0.11             | 0.078            | 0.08             | <b>0.010</b>     | 0.11             | <b>&lt;0.001</b> | 0.09             | <b>&lt;0.001</b> | 0.13             | <b>0.001</b>     |
| Emotional valence of information         | 0.07             | 0.190            | -0.04            | 0.193            | -0.07            | 0.061            | 0.00             | 0.978            | 0.02             | 0.651            | 0.01             | 0.490            | 0.06             | <b>0.004</b>     | 0.04             | 0.297            |
| Perceived personal risk                  | 0.17             | <b>0.002</b>     | 0.12             | <b>&lt;0.001</b> | 0.13             | <b>&lt;0.001</b> | 0.34             | <b>&lt;0.001</b> | -0.05            | 0.138            | 0.03             | 0.179            | 0.04             | 0.056            | 0.07             | 0.064            |
| Age                                      | -0.13            | <b>0.004</b>     | -0.00            | 0.916            | -0.04            | 0.220            | 0.00             | 0.937            | 0.14             | <b>&lt;0.001</b> | 0.18             | <b>&lt;0.001</b> | 0.19             | <b>&lt;0.001</b> | 0.07             | 0.113            |
| Gender (female)                          | -0.04            | 0.659            | 0.20             | <b>0.001</b>     | 0.12             | 0.070            | 0.09             | 0.439            | 0.14             | 0.053            | 0.23             | <b>&lt;0.001</b> | 0.14             | <b>0.001</b>     | 0.23             | <b>0.009</b>     |
| Education                                | -0.12            | <b>0.018</b>     | 0.04             | 0.262            | 0.02             | 0.675            | -0.03            | 0.709            | 0.01             | 0.759            | -0.00            | 0.846            | -0.01            | 0.631            | -0.03            | 0.501            |
| Infections in one's social circle (TRUE) | 0.93             | <b>0.001</b>     | 0.31             | <b>&lt;0.001</b> | 0.08             | 0.265            | 0.11             | 0.384            | 0.03             | 0.817            | 0.25             | <b>0.001</b>     | 0.10             | 0.146            | -0.18            | 0.173            |
| Observations                             | 496              |                  | 919              |                  | 877              |                  | 235              |                  | 1075             |                  | 2032             |                  | 2238             |                  | 665              |                  |
| R <sup>2</sup> adjusted                  | 0.150            |                  | 0.172            |                  | 0.138            |                  | 0.228            |                  | 0.039            |                  | 0.111            |                  | 0.139            |                  | 0.082            |                  |

Note: All variables are scaled and centered except categorical variables (gender, education, infections in one's social circle). Political affiliation is not included in this regression analysis because it was added to the survey only since the third wave of data collection.

## Section 4: Detailed Statistics of the Repeated-Measures ANOVA Tests

For all repeated-measures ANOVA analyses reported here, we tested the sphericity assumption. To avoid inflated statistical significances, degrees of freedom were adjusted when the sphericity assumption was violated.

**Table S3**

*Repeated-Measures ANOVA: Emotional Valence*

China

ANOVA table

| Effect | DF <sub>numerator</sub> | DF <sub>denominator</sub> | Statistics | p        | ges   |
|--------|-------------------------|---------------------------|------------|----------|-------|
| Wave   | 3                       | 1964                      | 28.5       | 7.41e-18 | 0.022 |

Post-hoc comparison (6 pairwise t-tests)

| Group1 | Group2 | N   | Statistic | df  | p.adj (Bonferroni) | p.adj Significance |
|--------|--------|-----|-----------|-----|--------------------|--------------------|
| W1     | W2     | 655 | -8.89     | 664 | 3.39e-17           | ***                |
| W1     | W3     | 655 | -6.53     | 664 | 7.62e-10           | ***                |
| W1     | W4     | 655 | -6.21     | 664 | 5.59e-9            | ***                |
| W2     | W3     | 655 | 2.23      | 664 | 1.57e-1            | ns                 |
| W2     | W4     | 655 | 2.04      | 664 | 2.48e-1            | ns                 |
| W3     | W4     | 655 | 0.008     | 664 | 1.00e+0            | ns                 |

United States

ANOVA table

| Effect | DF <sub>numerator</sub> | DF <sub>denominator</sub> | Statistics | p        | ges   |
|--------|-------------------------|---------------------------|------------|----------|-------|
| Wave   | 3                       | 699                       | 40.0       | 7.24e-24 | 0.058 |

Post-hoc comparison (6 pairwise t-tests)

| Group1 | Group2 | N   | Statistic | df  | p.adj (Bonferroni) | p.adj Significance |
|--------|--------|-----|-----------|-----|--------------------|--------------------|
| W1     | W2     | 234 | 9.65      | 233 | 5.53e-18           | ***                |
| W1     | W3     | 234 | 3.18      | 233 | 1.00e-2            | *                  |
| W1     | W4     | 234 | 1.63      | 233 | 6.30e-1            | ns                 |
| W2     | W3     | 234 | -6.94     | 233 | 2.36e-10           | ***                |
| W2     | W4     | 234 | -7.94     | 233 | 5.00e-13           | ***                |
| W3     | W4     | 234 | -1.67     | 233 | 5.75e-1            | ns                 |

Note: \*  $p < .05$ . \*\*  $p < .01$ . \*\*\*  $p < .001$ .



**Table S4***Repeated-Measures ANOVA: Life Satisfaction*

## China

## ANOVA table

| Effect | DF <sub>numerator</sub> | DF <sub>denominator</sub> | Statistics | p     | ges   |
|--------|-------------------------|---------------------------|------------|-------|-------|
| Wave   | 3                       | 1932                      | 3.4        | 0.018 | 0.001 |

## Post-hoc comparison (6 pairwise t-tests)

| Group1 | Group2 | N   | Statistic | df  | p.adj (Bonferroni) | p.adj Significance |
|--------|--------|-----|-----------|-----|--------------------|--------------------|
| W1     | W2     | 655 | -2.54     | 664 | 0.068              | ns                 |
| W1     | W3     | 655 | 0.672     | 664 | 1                  | ns                 |
| W1     | W4     | 655 | -0.976    | 664 | 1                  | ns                 |
| W2     | W3     | 655 | 2.99      | 664 | 0.017              | *                  |
| W2     | W4     | 655 | 1.26      | 664 | 1                  | ns                 |
| W3     | W4     | 655 | -1.77     | 664 | 0.466              | ns                 |

## United States

## ANOVA table

| Effect | DF <sub>numerator</sub> | DF <sub>denominator</sub> | Statistics | p      | ges   |
|--------|-------------------------|---------------------------|------------|--------|-------|
| Wave   | 3                       | 669                       | 6.53       | 0.0003 | 0.003 |

## Post-hoc comparison (6 pairwise t-tests)

| Group1 | Group2 | N   | Statistic | df  | p.adj (Bonferroni) | p.adj Significance |
|--------|--------|-----|-----------|-----|--------------------|--------------------|
| W1     | W2     | 234 | 4.27      | 233 | 0.0002             | ***                |
| W1     | W3     | 234 | 3.06      | 233 | 0.015              | *                  |
| W1     | W4     | 234 | 3.05      | 233 | 0.015              | *                  |
| W2     | W3     | 234 | -1.11     | 233 | 1                  | ns                 |
| W2     | W4     | 234 | -0.62     | 233 | 1                  | ns                 |
| W3     | W4     | 234 | 0.36      | 233 | 1                  | ns                 |

Note: \*  $p < .05$ . \*\*  $p < .01$ . \*\*\*  $p < .001$ .

**Table S5***Repeated-Measures ANOVA: Perceived Risk*

## China

## ANOVA table

| Effect | DF <sub>numerator</sub> | DF <sub>denominator</sub> | Statistics | p        | ges   |
|--------|-------------------------|---------------------------|------------|----------|-------|
| Wave   | 3                       | 1865                      | 26.9       | 3.71e-16 | 0.015 |

## Post-hoc comparison (6 pairwise t-tests)

| Group1 | Group2 | N   | Statistic | df  | p.adj (Bonferroni) | p.adj Significance |
|--------|--------|-----|-----------|-----|--------------------|--------------------|
| W1     | W2     | 655 | 5.46      | 664 | 4.06e- 7           | ***                |
| W1     | W3     | 655 | 8.11      | 664 | 1.52e-14           | ***                |
| W1     | W4     | 655 | 5.88      | 664 | 3.88e- 8           | ***                |
| W2     | W3     | 655 | 3.02      | 664 | 1.60e- 2           | *                  |
| W2     | W4     | 655 | 0.77      | 664 | 1                  | ns                 |
| W3     | W4     | 655 | -2.20     | 664 | 1.67e- 1           | ns                 |

## United States

## ANOVA table

| Effect | DF <sub>numerator</sub> | DF <sub>denominator</sub> | Statistics | p        | ges   |
|--------|-------------------------|---------------------------|------------|----------|-------|
| Wave   | 3                       | 624                       | 137.7      | 7.44e-63 | 0.186 |

## Post-hoc comparison (6 pairwise t-tests)

| Group1 | Group2 | N   | Statistic | df  | p.adj (Bonferroni) | p.adj Significance |
|--------|--------|-----|-----------|-----|--------------------|--------------------|
| W1     | W2     | 234 | -16.8     | 233 | 2.59e-41           | ***                |
| W1     | W3     | 234 | -13.3     | 233 | 1.32e-29           | ***                |
| W1     | W4     | 234 | -14.5     | 233 | 1.38e-33           | ***                |
| W2     | W3     | 234 | 3.99      | 233 | 5.21e- 4           | ***                |
| W2     | W4     | 234 | 2.61      | 233 | 5.80e- 2           | ns                 |
| W3     | W4     | 234 | -1.26     | 233 | 1                  | ns                 |

Note: \*  $p < .05$ . \*\*  $p < .01$ . \*\*\*  $p < .001$ .
